# Supplementary material
Source: HighWire-hosted journal article supplement (https://www.rcpjournals.org/highwire/filestream/11659/field_highwire_adjunct_files/2/Tavabie_Supplementary_material_S3.pdf)
Supplement: Tavabie_Supplementary_material_S3.pdf [file Tavabie_Supplementary_material_S3.pdf]

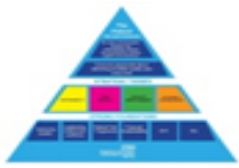

## Guideline for the care of dying patients with COVID-19

**HAVE YOU RECOGNISED YOUR PATIENT MAY DIE IN THE COMING HOURS OR DAYS?**

**ENSURE YOU:**

- HAVE CONSIDERED POTENTIALLY REVERSIBLE CAUSES WHICH MAY BE APPROPRIATELY TREATED
- HAVE COMMUNICATED WITH THE PATIENT AND THOSE IMPORTANT TO THEM
- AIM TO INVOLVE A SENIOR DECISION MAKER (SpR/CONSULTANT)
- DOCUMENT CPR STATUS AND TREATMENT ESCALATION PLAN
- ASSESS SYMPTOMS AND PRESCRIBE APPROPRIATE MEDICATION
- ASSESS NEED FOR CLINICALLY ASSISTED HYDRATION AND NUTRITION
- CONSIDER IF DISCHARGE IS FEASIBLE IF PREFERRED PLACE OF CARE IS HOME
- CONSULT 'PALLIATIVE CARE' TAB ON TRUST INTRANET FOR FURTHER GUIDANCE

**DOCTORS**

**THEN:**

**NURSES**

COMPLETE INDIVIDUALISED CARE PLAN (ICP) FOR THE DYING PATIENT OVERLEAF

ONCE ICP COMPLETED USE SYMPTOM OBSERVATION CHART & DAILY CARE PLAN FOR THE DYING PATIENT

**COMMUNICATE** with sensitivity and compassion with the patient and those closest to them. **INVOLVE** patient (where possible) and those closest to them in decisions as much as they want. **SUPPORT** & explore holistic needs of patient and those closest to them. Be mindful family may not be able to visit, is there an alternative way for them to talk?

**Write, Phone, Text, Face-time**

*All our resources are available on BSUH Microguide*

BSUH Specialist Palliative Care Team can be contacted for advice on Bleep 8420/6105 (9-5pm Monday-Friday).

For advice out of hours contact

RSCH: Martlets Hospice (01273 964164)

PRH: St Peter & St James (01444 471598).

**PLAN & DELIVER AN INDIVIDUALISED**

**APPROACH TO CARE:**

**PHYSICAL:**

Assess for Pain, Agitation, Dyspnoea, Respiratory Secretions, and Nausea [Do not suction]

Prescribe Anticipatory/Just in Case Medication

Mouth Care, allow to eat and drink @ risk

**PSYCHOLOGICAL:**

Address what is most important to the individual in the last phase of their life

**SOCIAL:**

Identify main contact and ensure contact details are documented

**SPIRITUAL:**

Assess if religion or spirituality is important to them, contacting chaplaincy if needed via switchboard

**EMERGENCY MEDICATION:**

**USE BSUH SYMPTOM OBSERVATION CHART**

- **Pain:** Morphine\* 2.5-5mg S/C hourly PRN
  - **Dyspnoea:** Morphine\* 2.5-5mg S/C 4hourly PRN
  - **Agitation:** Midazolam 2.5-5mg S/C hourly PRN
  - **Respiratory Secretions:** Glycopyrronium 0.2mg S/C 4hourly PRN
  - **Nausea:** Haloperidol 1.5mg S/C 4hourly PRN
- \*If eGFR <30
- **Pain & Dyspnoea:** Oxycodone 1.25-2.5mg S/C hourly PRN

Opioid and anxiolytics should not be withheld due to inappropriate concern about respiratory depression.

Once Decision for EOLC has been made, Oxygen should be discontinued

If 1st line drug or syringe pump not available contact palliative care team
